# Supplementary material
Source: PubMed Central journal article supplement (PMC3105146)

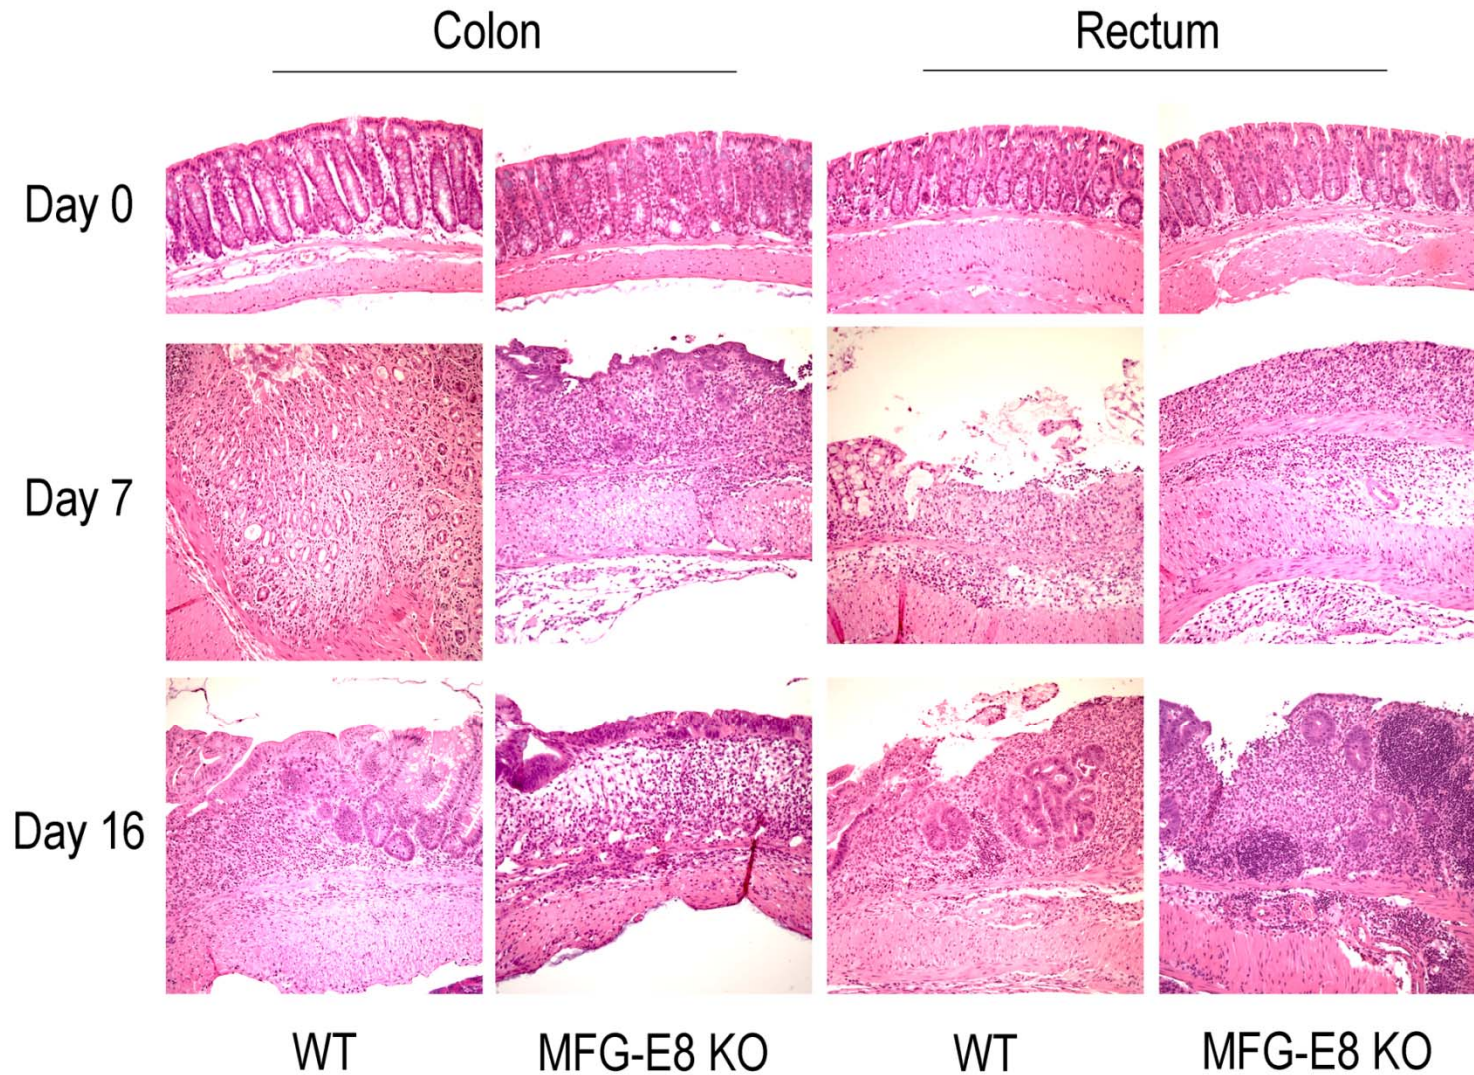

Supplement: 10_74_Chogle_Suppl.pdf [file 10_74_Chogle_Suppl.pdf]
